# Supplementary material for: Microstructure and oxidation resistance of relaxed epitaxial nickel thin films grown on (100)- and (110)-SrTiO3 substrates by pulsed laser deposition
Source: Royal Society of Chemistry journal article supplement (doi:10.1039/c8ce00797g), 2018-01-01
Supplement: c8ce00797g1.pdf [file c8ce00797g1.pdf]

### Supporting informations :

## Microstructure and Oxidation Resistance of Relaxed Epitaxial Nickel Thin Films Grown on (100)- and (110)-SrTiO<sub>3</sub> substrates by Pulsed Laser Deposition

Gauthier Lefevre<sup>1</sup>, Sébastien Saitzek<sup>1</sup>, Florent Blanchard<sup>1</sup>, Anthony Ferri<sup>1</sup>, Pascal Roussel<sup>1</sup>, Rachel Desfeux<sup>1</sup>, Adlane Sayede<sup>1</sup>

<sup>1</sup> Univ. Artois, CNRS, Centrale Lille, ENSCL, Univ. Lille, UMR 8181, Unité de Catalyse et Chimie du Solide (UCCS), F-62300 Lens, France

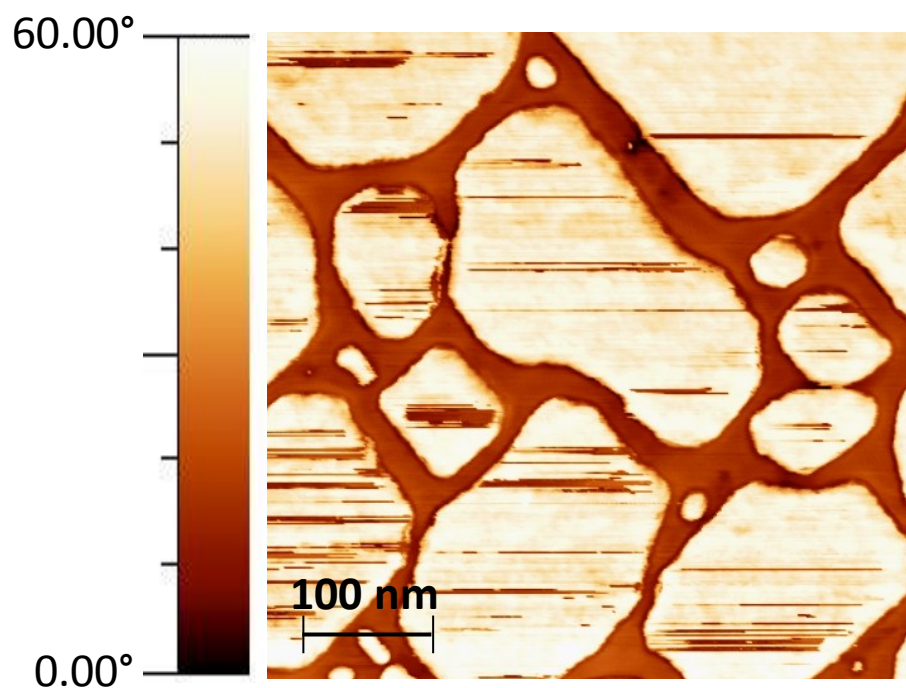

**Figure S1.** AFM-AC image of the as-deposited Ni thin film on (100)-SrTiO<sub>3</sub>
